# Supplementary material for: Hetero triply-bridged dinuclear copper(ii) compounds with ferromagnetic coupling: a challenge for current density functionals
Source: Royal Society of Chemistry journal article supplement (doi:10.1039/c2cp43839a), 2012-12-04
Supplement: c2cp43839a.pdf [file c2cp43839a.pdf]

## Supporting Information file

### Hetero Triply-bridged Dinuclear Copper(II) Compounds with Ferromagnetic Coupling: A Challenge for Current Density Functionals

Nanthawat Wannarit,<sup>a,b</sup> Chaveng Pakawatchai,<sup>c</sup> Ilpo Mutikainen,<sup>d</sup> Ramon Costa,<sup>\*,b</sup> Ibério de P. R. Moreira,<sup>e</sup> Sujittra Youngme<sup>\*,a</sup> and Francesc Illas<sup>\*,e</sup>

*<sup>a)</sup> Materials Chemistry Research Unit, Department of Chemistry and Center of Excellence for Innovation in Chemistry, Faculty of Science, Khon Kaen University, Khon Kaen 40002, Thailand*

*<sup>b)</sup> Departament de Química Inorgànica & Institut de Química Teòrica i Computacional (IQTUCB), Universitat de Barcelona, C/ Martí i Franquès 1, E-08028 Barcelona, Spain*

*<sup>c)</sup> Department of Chemistry, Faculty of Science, Prince of Songkla University, Hat Yai, Songkhla 90112, Thailand*

*<sup>d)</sup> Laboratory of Inorganic Chemistry, Department of Chemistry, University of Helsinki, FIN-00014 Helsinki, Finland*

*<sup>e)</sup> Departament de Química Física & Institut de Química Teòrica i Computacional (IQTUCB), Universitat de Barcelona, C/ Martí i Franquès 1, E-08028 Barcelona, Spain*

\*Corresponding authors:

\*Corresponding authors:

[sujittra@kku.ac.th](mailto:sujittra@kku.ac.th) , Phone: +66-43202222 ext. 12243, Fax: +66-43202373;

[francesc.illas@ub.edu](mailto:francesc.illas@ub.edu), Phone + 34-934021229, Fax: +34-934021231

[rcosta@ub.edu](mailto:rcosta@ub.edu) Phone + 34-934039130

## Synthesis conditions and procedure for compounds 2 to 7

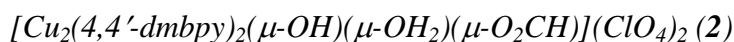

A warmed methanol solution (10 ml) of 4,4'-dmbpy (0.184 g, 1.0 mmol) was added to a warmed aqueous solution (20 ml) of  $Cu(ClO_4)_2 \cdot 6H_2O$  (0.370 g, 1.0 mmol). Then an aqueous solution (5 ml) of  $NaO_2CH$  (0.204 g, 3.0 mmol) was slowly added. The mixture was warmed with adding DMF (2 ml), yielding a clear dark blue solution. On slow evaporation at room temperature for 5 days, the product **2** was isolated as dark blue block-shaped crystals. The crystals were filtered off, washed with the mother liquid and air-dried. Yield: ca. 53%. Anal. Calc. for  $C_{25}H_{28}Cl_2Cu_2N_4O_{12}$ : C, 38.84; H, 3.26; N, 7.01. Found: C, 38.76; H, 3.62; N, 7.23%.

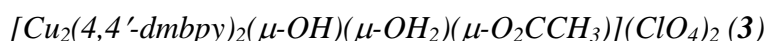

A warmed methanol solution (10 ml) of 4,4'-dmbpy (0.184 g, 1.0 mmol) was added to a warmed aqueous solution (20 ml) of  $Cu(ClO_4)_2 \cdot 6H_2O$  (0.370 g, 1.0 mmol). Then an aqueous solution (5 ml) of  $NaO_2CCH_3$  (0.204 g, 3.0 mmol) was slowly added. The mixture was warmed with adding DMF (2 ml), yielding a clear dark blue solution. On slow evaporation at room temperature for 5 days, the product **3** was isolated as blue block-shaped crystals. The crystals were filtered off, washed with the mother liquid and air-dried. Yield: ca. 46%. Anal. Calc. for  $C_{26}H_{30}Cl_2Cu_2N_4O_{12}$ : C, 39.57; H, 3.84; N, 7.10. Found: C, 39.92; H, 3.88; N, 7.57%.

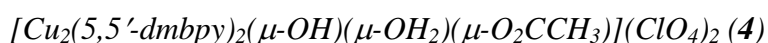

A warmed methanol solution (10 ml) of 5,5'-dmbpy (0.184 g, 1.0 mmol) was added to a warmed aqueous solution (20 ml) of  $Cu(ClO_4)_2 \cdot 6H_2O$  (0.370 g, 1.0 mmol). Then solid  $NaO_2CCH_3$  (0.204 g, 3.0 mmol) was slowly added. The mixture was warmed with adding DMF (2 ml), yielding a clear dark blue solution. On slow evaporation at room temperature for 5 days, the product **4** was isolated as blue block-shaped crystals. The crystals were filtered off, washed with the mother liquid and air-dried. Yield: ca. 42%. Anal. Calc. for  $C_{26}H_{30}Cl_2Cu_2N_4O_{12}$ : C, 39.57; H, 3.84; N, 7.10. Found: C, 39.83; H, 3.16; N, 7.51%.

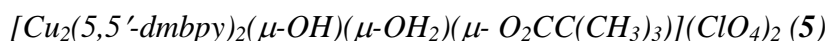

A warmed methanol solution (10 ml) of 5,5'-dmbpy (0.184 g, 1.0 mmol) was added to a warmed aqueous solution (20 ml) of  $Cu(ClO_4)_2 \cdot 6H_2O$  (0.370 g, 1.0 mmol). Then solid  $NaO_2CC(CH_3)_3$  (0.204 g, 3.0 mmol) was slowly added. The mixture was warmed with adding DMF (2 ml), yielding a clear dark blue solution. On slow evaporation at room temperature for a week, the product **5** was isolated as dark blue block-shaped crystals. The crystals were

filtered off, washed with the mother liquid and air-dried. Yield: ca. 30%. Anal. Calc. for  $C_{29}H_{36}Cl_2Cu_2N_4O_{12}$ : C, 41.90; H, 4.38; N, 6.74. Found: C, 41.75; H, 4.40; N, 6.73%.

$[Cu_2(5,5'-dmbpy)_2(\mu-OH)(\mu-OH_2)(\mu-O_2CCH_3)](CF_3SO_3)_2$  (**6**)

A warmed methanol solution (10 ml) of 5,5'-dmbpy (0.184 g, 1.0 mmol) was added to a warmed aqueous solution (20 ml) of  $Cu(CF_3SO_3)_2$  (0.361 g, 1.0 mmol). Then solid  $NaO_2CCH_3$  (0.204 g, 3.0 mmol) was slowly added. The mixture was warmed with adding DMF (2 ml), yielding a clear dark blue solution. On slow evaporation at room temperature for 7 days, the product **6** was isolated as dark blue block-shaped crystals. The crystals were filtered off, washed with the mother liquid and air-dried. Yield: ca. 40%. Anal. Calc. for  $C_{28}H_{30}Cu_2F_6N_4O_{10}S_2$ : C, 37.86; H, 3.41; N, 6.31. Found: C, 37.70; H, 3.17; N, 6.51%.

$[Cu_2(5,5'-dmbpy)_2(\mu-OH)(\mu-OH_2)(\mu-O_2CCH_2CH_3)](CF_3SO_3)_2$  (**7**)

A warmed methanol solution (10 ml) of 5,5'-dmbpy (0.184 g, 1.0 mmol) was added to a warmed aqueous solution (20 ml) of  $Cu(CF_3SO_3)_2$  (0.361 g, 1.0 mmol). Then solid  $NaO_2CCH_2CH_3$  (0.204 g, 3.0 mmol) was slowly added. The mixture was warmed with adding DMF (2 ml), yielding a clear dark blue solution. On slow evaporation at room temperature for 6 days, the product **7** was isolated as violet block-shaped crystals. The crystals were filtered off, washed with the mother liquid and air-dried. Yield: ca. 30%. Anal. Calc. for  $C_{29}H_{32}Cu_2F_6N_4O_{10}S_2$ : C, 38.60; H, 3.58; N, 6.21. Found: C, 38.73; H, 3.50; N, 6.34%.

**Table S1.** Crystallographic and refinement data for compounds **1-7**

| Compound                                                                                                | <b>1</b>                                                                                                        | <b>2</b>                                                                                          | <b>3</b>                                                                                          | <b>4</b>                                                                                          | <b>5</b>                                                                               | <b>6</b>                                                                                                        | <b>7</b>                                                                                                        |
|---------------------------------------------------------------------------------------------------------|-----------------------------------------------------------------------------------------------------------------|---------------------------------------------------------------------------------------------------|---------------------------------------------------------------------------------------------------|---------------------------------------------------------------------------------------------------|----------------------------------------------------------------------------------------|-----------------------------------------------------------------------------------------------------------------|-----------------------------------------------------------------------------------------------------------------|
| Empirical formula                                                                                       | C <sub>24</sub> H <sub>22</sub> Cu <sub>2</sub> F <sub>6</sub> N <sub>4</sub><br>O <sub>10</sub> S <sub>2</sub> | C <sub>25</sub> H <sub>28</sub> Cl <sub>2</sub> Cu <sub>2</sub> N <sub>4</sub><br>O <sub>12</sub> | C <sub>26</sub> H <sub>30</sub> Cl <sub>2</sub> Cu <sub>2</sub> N <sub>4</sub><br>O <sub>12</sub> | C <sub>26</sub> H <sub>30</sub> Cl <sub>2</sub> Cu <sub>2</sub> N <sub>4</sub><br>O <sub>12</sub> | C <sub>29</sub> H <sub>36</sub> Cl <sub>2</sub> Cu <sub>2</sub> N <sub>4</sub> O<br>12 | C <sub>28</sub> H <sub>30</sub> Cu <sub>2</sub> F <sub>6</sub> N <sub>4</sub><br>O <sub>10</sub> S <sub>2</sub> | C <sub>29</sub> H <sub>32</sub> Cu <sub>2</sub> F <sub>6</sub> N <sub>4</sub><br>O <sub>10</sub> S <sub>2</sub> |
| Formula weight                                                                                          | 831.66                                                                                                          | 774.49                                                                                            | 788.52                                                                                            | 788.52                                                                                            | 830.59                                                                                 | 887.76                                                                                                          | 901.79                                                                                                          |
| T/K                                                                                                     | 100(2)                                                                                                          | 100(2)                                                                                            | 150(2)                                                                                            | 100(2)                                                                                            | 173(2)                                                                                 | 100(2)                                                                                                          | 100(2)                                                                                                          |
| Crystal system                                                                                          | triclinic                                                                                                       | triclinic                                                                                         | triclinic                                                                                         | monoclinic                                                                                        | triclinic                                                                              | monoclinic                                                                                                      | triclinic                                                                                                       |
| Space group                                                                                             | P -1                                                                                                            | P -1                                                                                              | P -1                                                                                              | P2 <sub>1</sub> /n                                                                                | P -1                                                                                   | P2 <sub>1</sub> /n                                                                                              | P -1                                                                                                            |
| <i>a</i> (Å)                                                                                            | 8.3587(5)                                                                                                       | 8.0321(6)                                                                                         | 8.4364(5)                                                                                         | 8.2136(3)                                                                                         | 8.6600(10)                                                                             | 9.1312(6)                                                                                                       | 9.1519(6)                                                                                                       |
| <i>b</i> (Å)                                                                                            | 11.3580(6)                                                                                                      | 11.1208(8)                                                                                        | 11.0080(7)                                                                                        | 16.5961(6)                                                                                        | 12.712(2)                                                                              | 17.4262(11)                                                                                                     | 12.2550(8)                                                                                                      |
| <i>c</i> (Å)                                                                                            | 16.6543(9)                                                                                                      | 16.9976(12)                                                                                       | 17.0555(10)                                                                                       | 22.9861(9)                                                                                        | 16.826(2)                                                                              | 22.0653(14)                                                                                                     | 16.5318(10)                                                                                                     |
| $\alpha$ (°)                                                                                            | 71.2370(10)                                                                                                     | 87.467(4)                                                                                         | 94.2320(10)                                                                                       | 90.00                                                                                             | 71.420(10)                                                                             | 90.00                                                                                                           | 104.155(2)                                                                                                      |
| $\beta$ (°)                                                                                             | 81.4730(10)                                                                                                     | 88.341(4)                                                                                         | 92.7770(10)                                                                                       | 95.8280(10)                                                                                       | 89.940(10)                                                                             | 90.562(3)                                                                                                       | 92.966(2)                                                                                                       |
| $\gamma$ (°)                                                                                            | 86.1070(10)                                                                                                     | 79.509(4)                                                                                         | 95.2800(10)                                                                                       | 90.00                                                                                             | 75.560(10)                                                                             | 90.00                                                                                                           | 97.551(2)                                                                                                       |
| <i>V</i> (Å <sup>3</sup> )                                                                              | 1480.21(14)                                                                                                     | 1491.11(19)                                                                                       | 1570.45(16)                                                                                       | 3117.1(2)                                                                                         | 1694.1(4)                                                                              | 3510.9(4)                                                                                                       | 1775.5(2)                                                                                                       |
| <i>Z</i>                                                                                                | 2                                                                                                               | 2                                                                                                 | 2                                                                                                 | 4                                                                                                 | 2                                                                                      | 4                                                                                                               | 2                                                                                                               |
| <i>D</i> <sub>calc</sub> (g cm <sup>-3</sup> )                                                          | 1.866                                                                                                           | 1.725                                                                                             | 1.668                                                                                             | 1.680                                                                                             | 1.626                                                                                  | 1.680                                                                                                           | 1.687                                                                                                           |
| $\mu$ (mm <sup>-1</sup> )                                                                               | 1.679                                                                                                           | 1.675                                                                                             | 1.592                                                                                             | 1.604                                                                                             | 1.480                                                                                  | 1.422                                                                                                           | 1.407                                                                                                           |
| <i>F</i> (000)                                                                                          | 836                                                                                                             | 788                                                                                               | 804                                                                                               | 1608                                                                                              | 850                                                                                    | 1800                                                                                                            | 916                                                                                                             |
| Crystal size (mm)                                                                                       | 0.09×0.21×0.22                                                                                                  | 0.20×0.22×0.46                                                                                    | 0.13×0.15×0.28                                                                                    | 0.08×0.16×0.40                                                                                    | 0.08×0.10×0.30                                                                         | 0.04×0.32×0.38                                                                                                  | 0.30×0.40×0.48                                                                                                  |
| Number of reflection collected                                                                          | 19850                                                                                                           | 22123                                                                                             | 21625                                                                                             | 42942                                                                                             | 21277                                                                                  | 27236                                                                                                           | 21801                                                                                                           |
| Number of unique reflections ( <i>R</i> <sub>int</sub> )                                                | 7106 (0.0368)                                                                                                   | 11199 (0.0372)                                                                                    | 7591 (0.0250)                                                                                     | 7717 (0.0190)                                                                                     | 5938 (0.0534)                                                                          | 6182 (0.0623)                                                                                                   | 10807 (0.0239)                                                                                                  |
| Data/restraints/ parameter                                                                              | 7106/0/521                                                                                                      | 11199/0/518                                                                                       | 7591/0/535                                                                                        | 7717/0/432                                                                                        | 5938/86/486                                                                            | 6182/27/540                                                                                                     | 10807/0/584                                                                                                     |
| Goodness-of-fit                                                                                         | 1.064                                                                                                           | 1.099                                                                                             | 1.046                                                                                             | 1.049                                                                                             | 1.267                                                                                  | 1.147                                                                                                           |                                                                                                                 |
| Final <i>R</i> indices [ <i>I</i> > 2σ( <i>I</i> )]                                                     | <i>R</i> <sub>1</sub> = 0.0325<br><i>wR</i> <sub>2</sub> = 0.0871                                               | <i>R</i> <sub>1</sub> = 0.0283<br><i>wR</i> <sub>2</sub> = 0.0827                                 | <i>R</i> <sub>1</sub> = 0.0301<br><i>wR</i> <sub>2</sub> = 0.0811                                 | <i>R</i> <sub>1</sub> = 0.0292<br><i>wR</i> <sub>2</sub> = 0.0785                                 | <i>R</i> <sub>1</sub> = 0.0778<br><i>wR</i> <sub>2</sub> = 0.1758                      | <i>R</i> <sub>1</sub> = 0.0652<br><i>wR</i> <sub>2</sub> = 0.1436                                               | <i>R</i> <sub>1</sub> = 0.0424<br><i>wR</i> <sub>2</sub> = 0.1197                                               |
| <i>R</i> indices (all data)                                                                             | <i>R</i> <sub>1</sub> = 0.0368<br><i>wR</i> <sub>2</sub> = 0.0894                                               | <i>R</i> <sub>1</sub> = 0.0356<br><i>wR</i> <sub>2</sub> = 0.0953                                 | <i>R</i> <sub>1</sub> = 0.0333<br><i>wR</i> <sub>2</sub> = 0.0832                                 | <i>R</i> <sub>1</sub> = 0.0325<br><i>wR</i> <sub>2</sub> = 0.0806                                 | <i>R</i> <sub>1</sub> = 0.0900<br><i>wR</i> <sub>2</sub> = 0.1835                      | <i>R</i> <sub>1</sub> = 0.0810<br><i>wR</i> <sub>2</sub> = 0.1534                                               | <i>R</i> <sub>1</sub> = 0.0476<br><i>wR</i> <sub>2</sub> = 0.1265                                               |
| Largest difference in peak and hole (e <sup>3</sup> )                                                   | 0.930 and -0.805                                                                                                | 0.630 and -0.538                                                                                  | 0.946 and -0.608                                                                                  | 1.134 and -0.504                                                                                  | 2.715 and -1.414                                                                       | 0.911 and -0.594                                                                                                | 3.581 and -1.316                                                                                                |
| $R = \sum   F_o  -  F_c   / \sum  F_o $ , $R_w = [\sum w\{  F_o  -  F_c  \}^2 / \sum w F_o ^2]^{1/2}$ . |                                                                                                                 |                                                                                                   |                                                                                                   |                                                                                                   |                                                                                        |                                                                                                                 |                                                                                                                 |

**Table S2.** Selected bond lengths (Å) and bond angles (deg) with e.s.d.s. in parentheses for compound **1**: [Cu<sub>2</sub>(bpy)<sub>2</sub>(μ-OH)(μ-OH<sub>2</sub>)(μ-O<sub>2</sub>CCH<sub>3</sub>)](CF<sub>3</sub>SO<sub>3</sub>)<sub>2</sub>

| Bond Lengths    |           |                 |           |
|-----------------|-----------|-----------------|-----------|
| Cu(1)-O(1)      | 1.931(1)  | Cu(2)-O(1)      | 1.921(1)  |
| Cu(1)-O(2)      | 2.394(1)  | Cu(2)-O(2)      | 2.323(1)  |
| Cu(1)-O(3)      | 1.942(1)  | Cu(2)-O(4)      | 1.956(1)  |
| Cu(1)-N(1)      | 1.994(1)  | Cu(2)-N(3)      | 2.009(1)  |
| Cu(1)-N(2)      | 2.004(1)  | Cu(2)-N(4)      | 1.998(1)  |
| Bond Angles     |           |                 |           |
| O(1)-Cu(1)-N(2) | 176.69(6) | O(1)-Cu(2)-N(4) | 174.14(6) |
| O(3)-Cu(1)-N(1) | 162.05(6) | O(4)-Cu(2)-N(3) | 159.20(6) |

**Table S3.** Selected bond lengths (Å) and angles (deg) with e.s.d.s. in parentheses for compound **2**: [Cu<sub>2</sub>(4,4'-dmbpy)<sub>2</sub>(μ-OH)(μ-OH<sub>2</sub>)(μ-O<sub>2</sub>CH)](ClO<sub>4</sub>)<sub>2</sub>

| Bond Lengths    |           |                 |           |
|-----------------|-----------|-----------------|-----------|
| Cu(1)-O(1)      | 1.914(1)  | Cu(2)-O(1)      | 1.908(1)  |
| Cu(1)-O(2)      | 2.324(1)  | Cu(2)-O(2)      | 2.409(1)  |
| Cu(1)-O(3)      | 1.959(1)  | Cu(2)-O(4)      | 1.983(1)  |
| Cu(1)-N(1)      | 1.999(1)  | Cu(2)-N(3)      | 1.978(1)  |
| Cu(1)-N(2)      | 1.996(1)  | Cu(2)-N(4)      | 1.995(1)  |
| Bond Angles     |           |                 |           |
| O(1)-Cu(1)-N(2) | 173.61(4) | O(1)-Cu(2)-N(3) | 173.12(5) |
| O(3)-Cu(1)-N(1) | 167.39(5) | O(4)-Cu(2)-N(4) | 150.49(5) |

**Table S4.** Selected bond lengths (Å) and angles (deg) with e.s.d.s. in parentheses for compound **3**: [Cu<sub>2</sub>(4,4'-dmbpy)<sub>2</sub>(μ-OH)(μ-OH<sub>2</sub>)(μ-O<sub>2</sub>CCH<sub>3</sub>)](ClO<sub>4</sub>)<sub>2</sub>

| Bond Lengths    |           |                 |           |
|-----------------|-----------|-----------------|-----------|
| Cu(1)-O(1)      | 1.918(1)  | Cu(2)-O(1)      | 1.918(1)  |
| Cu(1)-O(2)      | 2.323(1)  | Cu(2)-O(2)      | 2.442(1)  |
| Cu(1)-O(3)      | 1.945(1)  | Cu(2)-O(4)      | 1.958(1)  |
| Cu(1)-N(1)      | 1.996(1)  | Cu(2)-N(3)      | 1.985(1)  |
| Cu(1)-N(2)      | 1.999(1)  | Cu(2)-N(4)      | 1.993(1)  |
| Bond Angles     |           |                 |           |
| O(1)-Cu(1)-N(1) | 173.22(6) | O(1)-Cu(2)-N(3) | 171.86(6) |
| O(3)-Cu(1)-N(2) | 166.68(6) | O(4)-Cu(2)-N(4) | 153.99(6) |

**Table S5.** Selected bond lengths (Å) and angles (deg) with e.s.d.s. in parentheses for compound **4**: [Cu<sub>2</sub>(5,5'-dmbpy)<sub>2</sub>(μ-OH)(μ-OH<sub>2</sub>)(μ-O<sub>2</sub>CCH<sub>3</sub>)](ClO<sub>4</sub>)<sub>2</sub>

| Bond Lengths    |           |                 |           |
|-----------------|-----------|-----------------|-----------|
| Cu(1)-O(1)      | 1.937(1)  | Cu(2)-O(1)      | 1.929(1)  |
| Cu(1)-O(2)      | 2.329(1)  | Cu(2)-O(2)      | 2.346(1)  |
| Cu(1)-O(4)      | 1.947(1)  | Cu(2)-O(4)      | 1.950(1)  |
| Cu(1)-N(1)      | 1.996(1)  | Cu(2)-N(3)      | 1.991(1)  |
| Cu(1)-N(2)      | 1.986(1)  | Cu(2)-N(4)      | 2.003(1)  |
| Bond Angles     |           |                 |           |
| O(1)-Cu(1)-N(1) | 175.54(6) | O(1)-Cu(2)-N(3) | 175.16(6) |
| O(4)-Cu(1)-N(2) | 162.83(6) | O(3)-Cu(2)-N(4) | 162.19(6) |



**Table S6.** Selected bond lengths (Å) and angles (deg) with e.s.d.s. in parentheses for compound **5**: [Cu<sub>2</sub>(5,5'-dmbpy)<sub>2</sub>(μ-OH)(μ-OH<sub>2</sub>)(μ-O<sub>2</sub>CC(CH<sub>3</sub>)<sub>3</sub>)(ClO<sub>4</sub>)<sub>2</sub>

| Bond Lengths      |           |                   |          |
|-------------------|-----------|-------------------|----------|
| Cu(1)-O(1)        | 1.938(5)  | Cu(2)-O(1)        | 1.921(5) |
| Cu(1)-O(2)        | 2.320(5)  | Cu(2)-O(2)        | 2.333(5) |
| Cu(1)-O(32)       | 1.960(5)  | Cu(2)-O(31)       | 1.970(5) |
| Cu(1)-N(11)       | 2.002(6)  | Cu(2)-N(21)       | 2.012(6) |
| Cu(1)-N(112)      | 2.000(6)  | Cu(2)-N(212)      | 1.995(6) |
| Bond Angles       |           |                   |          |
| O(1)-Cu(1)-N(112) | 175.20(2) | O(1)-Cu(2)-N(212) | 174.6(2) |
| O(32)-Cu(1)-N(11) | 165.00(2) | O(31)-Cu(2)-N(21) | 163.2(2) |

**Table S7.** Selected bond lengths (Å) and angles (deg) with e.s.d.s. in parentheses for compound **6**: [Cu<sub>2</sub>(5,5'-dmbpy)<sub>2</sub>(μ-OH)(μ-OH<sub>2</sub>)(μ-O<sub>2</sub>CCH<sub>3</sub>)](CF<sub>3</sub>SO<sub>3</sub>)<sub>2</sub>

| Bond Lengths      |            |                   |            |
|-------------------|------------|-------------------|------------|
| Cu(1)-O(1)        | 1.964(4)   | Cu(2)-O(2)        | 1.958(4)   |
| Cu(1)-O(3)        | 1.923(4)   | Cu(2)-O(3)        | 1.931(4)   |
| Cu(1)-O(4)        | 2.310(4)   | Cu(2)-O(4)        | 2.323(4)   |
| Cu(1)-N(11)       | 1.999(5)   | Cu(2)-N(21)       | 2.003(5)   |
| Cu(1)-N(112)      | 1.985(5)   | Cu(2)-N(212)      | 1.993(5)   |
| Bond Angles       |            |                   |            |
| O(1)-Cu(1)-N(11)  | 155.80(18) | O(2)-Cu(2)-N(21)  | 157.33(19) |
| O(3)-Cu(1)-N(112) | 176.46(18) | O(3)-Cu(2)-N(212) | 176.05(17) |

**Table S8.** Selected bond lengths (Å) and angles (deg) with e.s.d.s. in parentheses for compound **7**: [Cu<sub>2</sub>(5,5'-dmbpy)<sub>2</sub>(μ-OH)(μ-OH<sub>2</sub>)(μ-O<sub>2</sub>CCH<sub>2</sub>CH<sub>3</sub>)](CF<sub>3</sub>SO<sub>3</sub>)<sub>2</sub>

| Bond Lengths    |           |                 |           |
|-----------------|-----------|-----------------|-----------|
| Cu(1)-O(1)      | 1.934(1)  | Cu(2)-O(1)      | 1.931(1)  |
| Cu(1)-O(2)      | 2.339(1)  | Cu(2)-O(2)      | 2.321(1)  |
| Cu(1)-O(3)      | 1.944(1)  | Cu(2)-O(4)      | 1.941(1)  |
| Cu(1)-N(1)      | 1.988(1)  | Cu(2)-N(3)      | 1.992(1)  |
| Cu(1)-N(2)      | 1.988(1)  | Cu(2)-N(4)      | 1.996(1)  |
| Bond Angles     |           |                 |           |
| O(1)-Cu(1)-N(1) | 175.80(7) | O(1)-Cu(2)-N(3) | 176.27(7) |
| O(3)-Cu(1)-N(2) | 162.20(7) | O(4)-Cu(2)-N(4) | 159.94(7) |

**Table S9.** Details about the best fit of the  $\chi_M T$  versus T curves to Eq. 3 ( $g_{iso}$ ,  $J_{exp}$  and  $\theta$ ) for compounds **1-7**. The last column reports the measured  $\chi_M T$  values at room temperature (298 K) with the values calculated from the fit given in parenthesis.

| Compound | $g_{iso}$   | $J_{exp}$ (cm <sup>-1</sup> ) | $\theta$ (K) | $N\alpha (\times 10^{-6})$ | $R (\times 10^{-4})$ | $(\chi_M T)_{RT}$ |
|----------|-------------|-------------------------------|--------------|----------------------------|----------------------|-------------------|
| <b>1</b> | 2.194±0.004 | 102.4±7.5                     | -0.39±0.02   | 30                         | 2.4                  | 1.007 (1.007)     |
| <b>2</b> | 2.163±0.006 | 72.6±6.1                      | -0.73±0.03   | 90                         | 3.6                  | 0.965 (0.970)     |
| <b>3</b> | 2.177±0.005 | 90.2±7.5                      | -0.58±0.03   | 60                         | 3.3                  | 0.987 (0.992)     |
| <b>4</b> | 2.167±0.003 | 104.3±6.0                     | -0.33±0.01   | 110                        | 1.4                  | 1.007 (1.008)     |
| <b>5</b> | 2.178±0.004 | 98.7±6.6                      | -0.31±0.02   | 50                         | 2.1                  | 0.998 (0.998)     |
| <b>6</b> | 2.196±0.005 | 92.1±7.4                      | -0.55±0.02   | 60                         | 3.1                  | 1.003 (1.009)     |
| <b>7</b> | 2.162±.004  | 103.1±7.6                     | -0.38±0.02   | 4.±4.                      | 2.3                  | 0.981 (0.981)     |



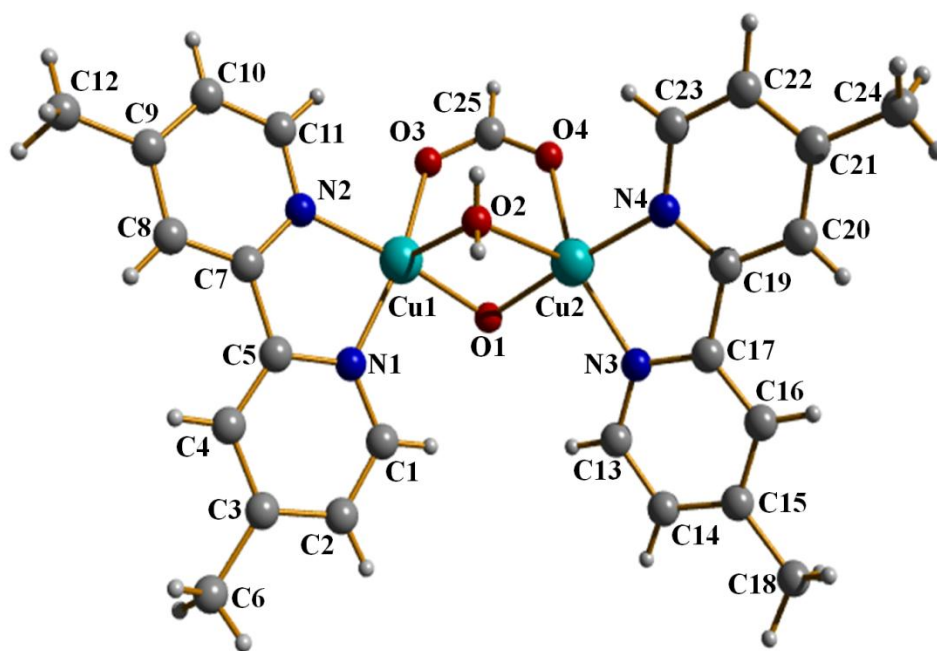

**Figure S1.** Molecular structure and atomic numbering scheme for compound **2**. Perchlorate counteranions are omitted for clarity.

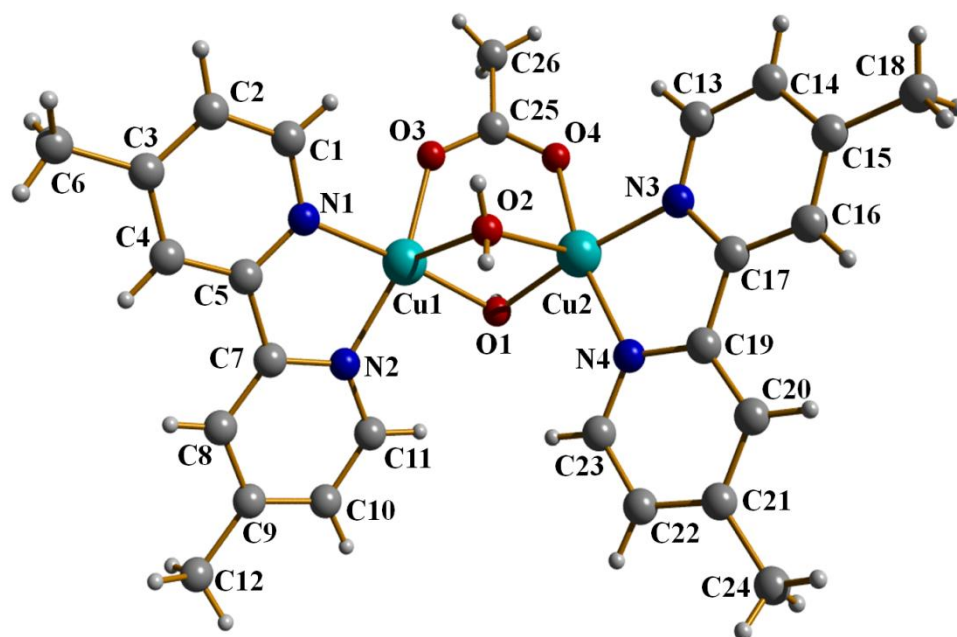

**Figure S2.** Molecular structure and atomic numbering scheme for compound **3**. Perchlorate counteranions are omitted for clarity.

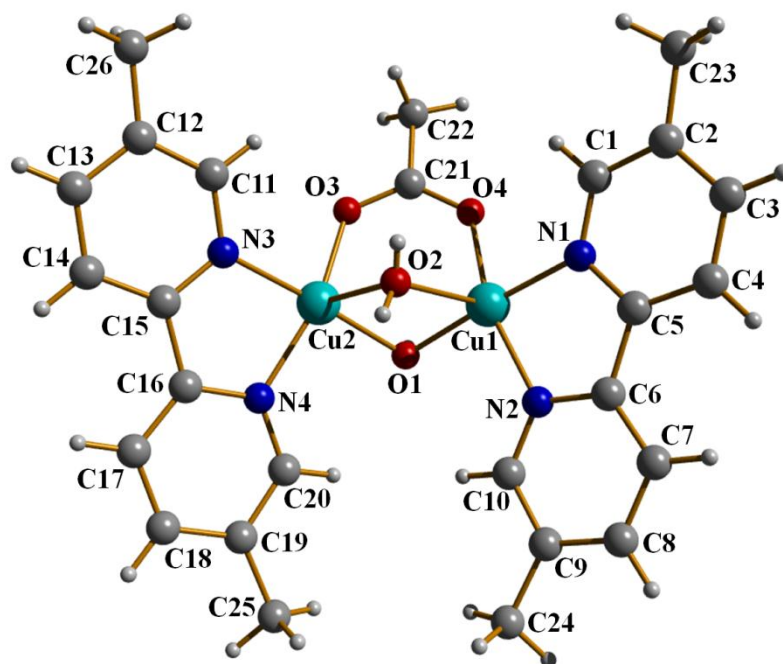

**Figure S3.** Molecular structure and atomic numbering scheme for compound **4**. Perchlorate counteranions are omitted for clarity.



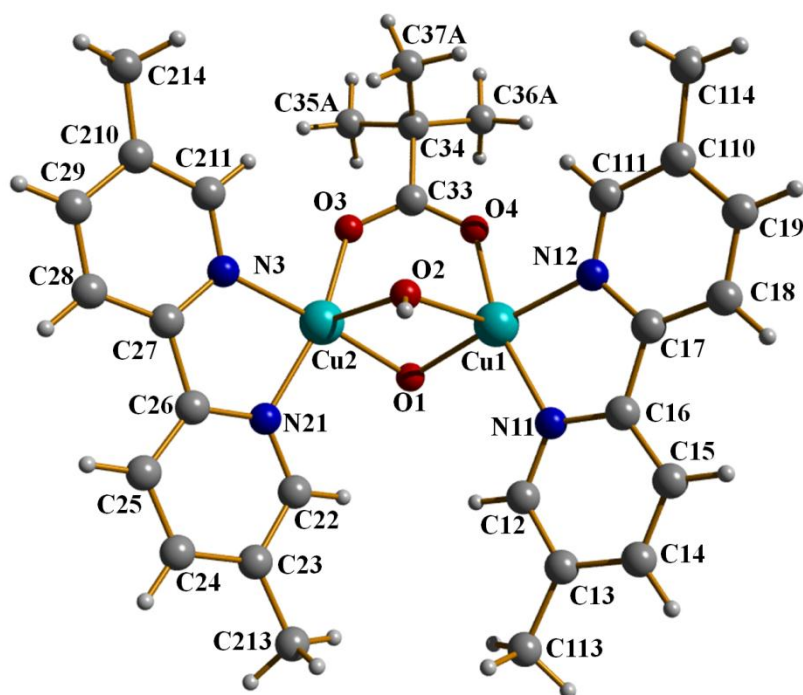

**Figure S4.** Molecular structure and atomic numbering scheme for compound **5**. Perchlorate counteranions are omitted for clarity.

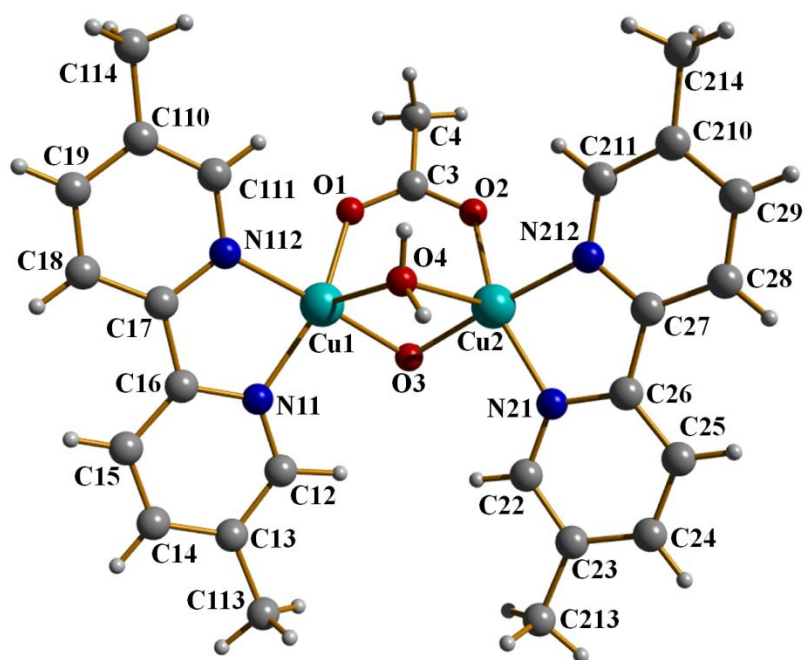

**Figure S5.** Molecular structure and atomic numbering scheme for compound **6**. Trifluoromethanesulfonate counteranions are omitted for clarity.

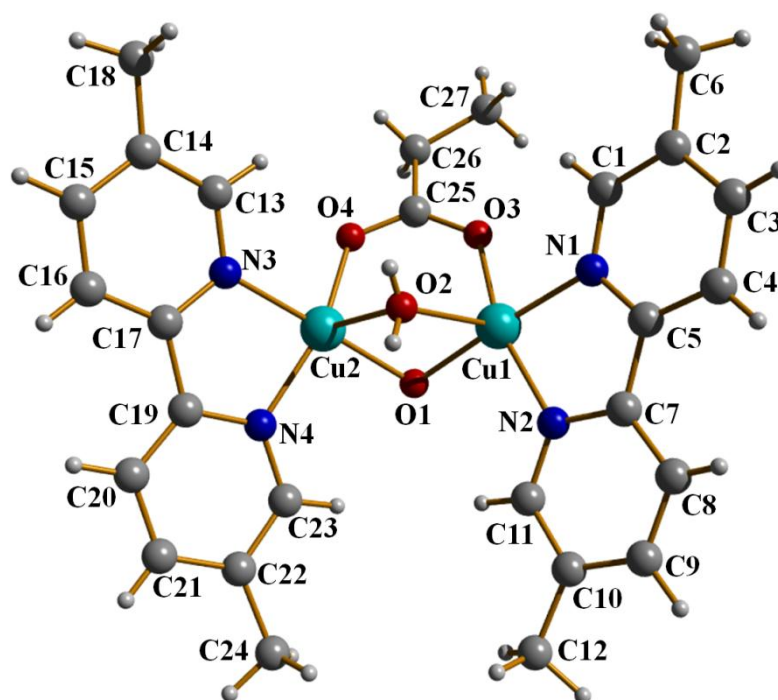

**Figure S6.** Molecular structure and atomic numbering scheme for compound **7**. Triflate counteranions are omitted for clarity.

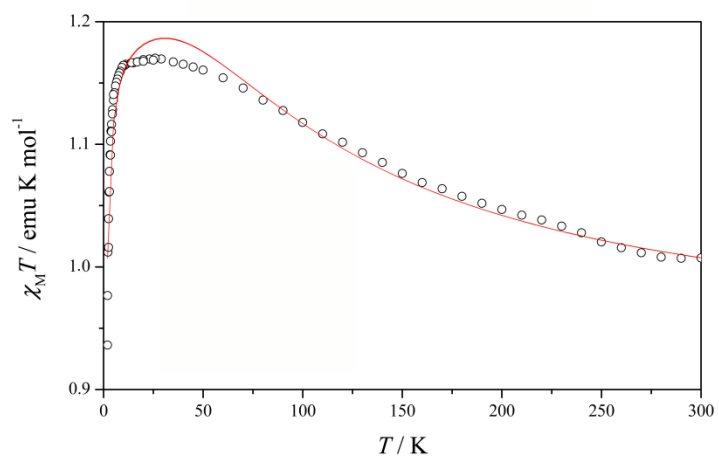

**Figure S7.** Plot of magnetic susceptibility-temperature product ( $\chi_M T$ ) versus temperature ( $T$ ) for compound **1**.

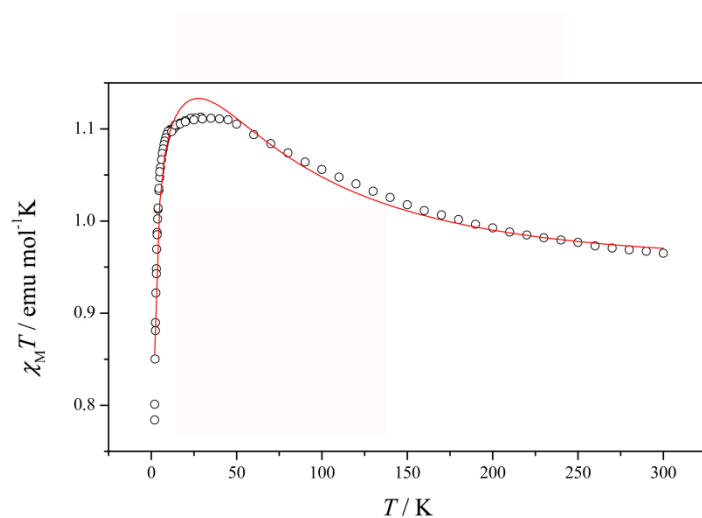

**Figure S8.** Plot of magnetic susceptibility-temperature product ( $\chi_M T$ ) versus temperature ( $T$ ) for compound **2**.

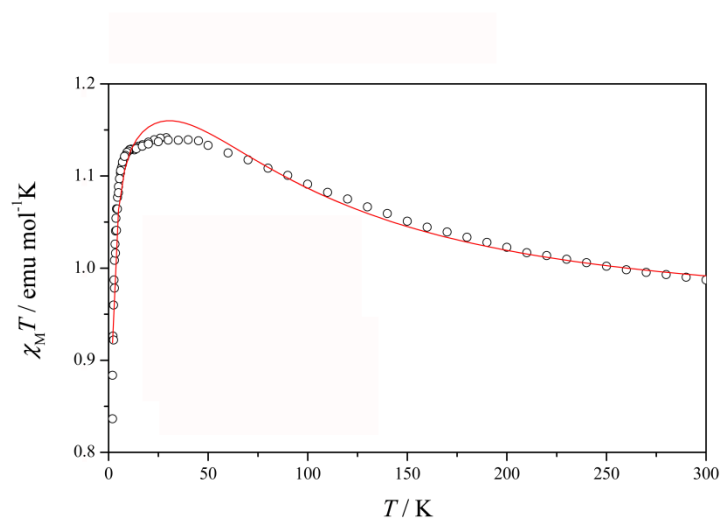

**Figure S9.** Plot of magnetic susceptibility-temperature product ( $\chi_M T$ ) versus temperature ( $T$ ) for compound **3**.



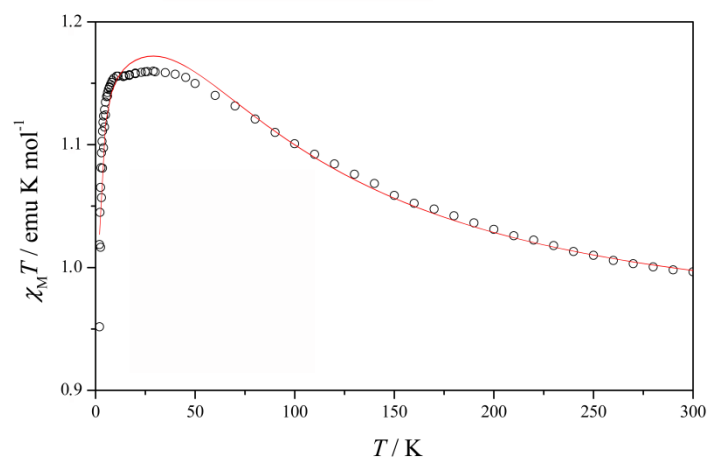

**Figure S10.** Plot of magnetic susceptibility-temperature product ( $\chi_M T$ ) versus temperature ( $T$ ) for compound **5**.

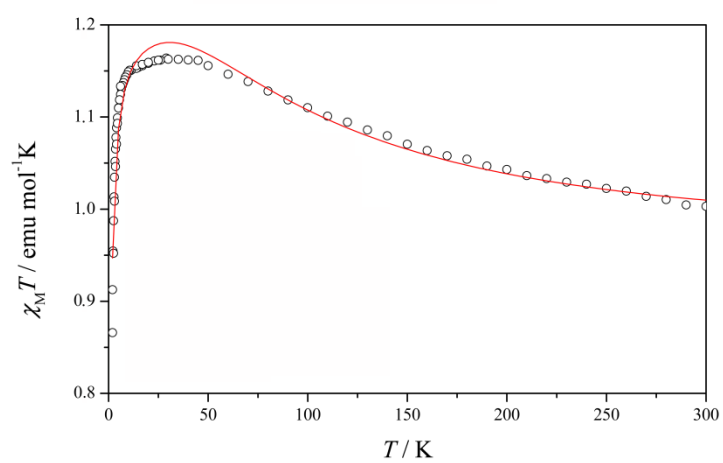

**Figure S11.** Plot of magnetic susceptibility-temperature product ( $\chi_M T$ ) versus temperature ( $T$ ) for compound **6**.



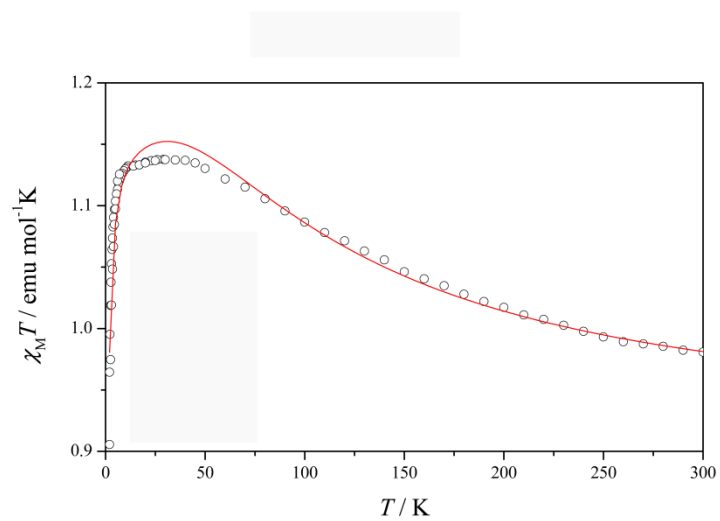

**Figure S12.** Plot of magnetic susceptibility-temperature product ( $\chi_M T$ ) versus temperature ( $T$ ) for compound **7**.
